# Supplementary material for: The impact of financial support and budgeting on medication availability and purchasing behavior in the Nigerian primary healthcare system
Source: bioRxiv or medRxiv preprint supplement (doi:10.1101/2024.08.23.24312494), 2024-08-23
Supplement: Supplementary file [file media-1.pdf]

## SUPPLEMENT

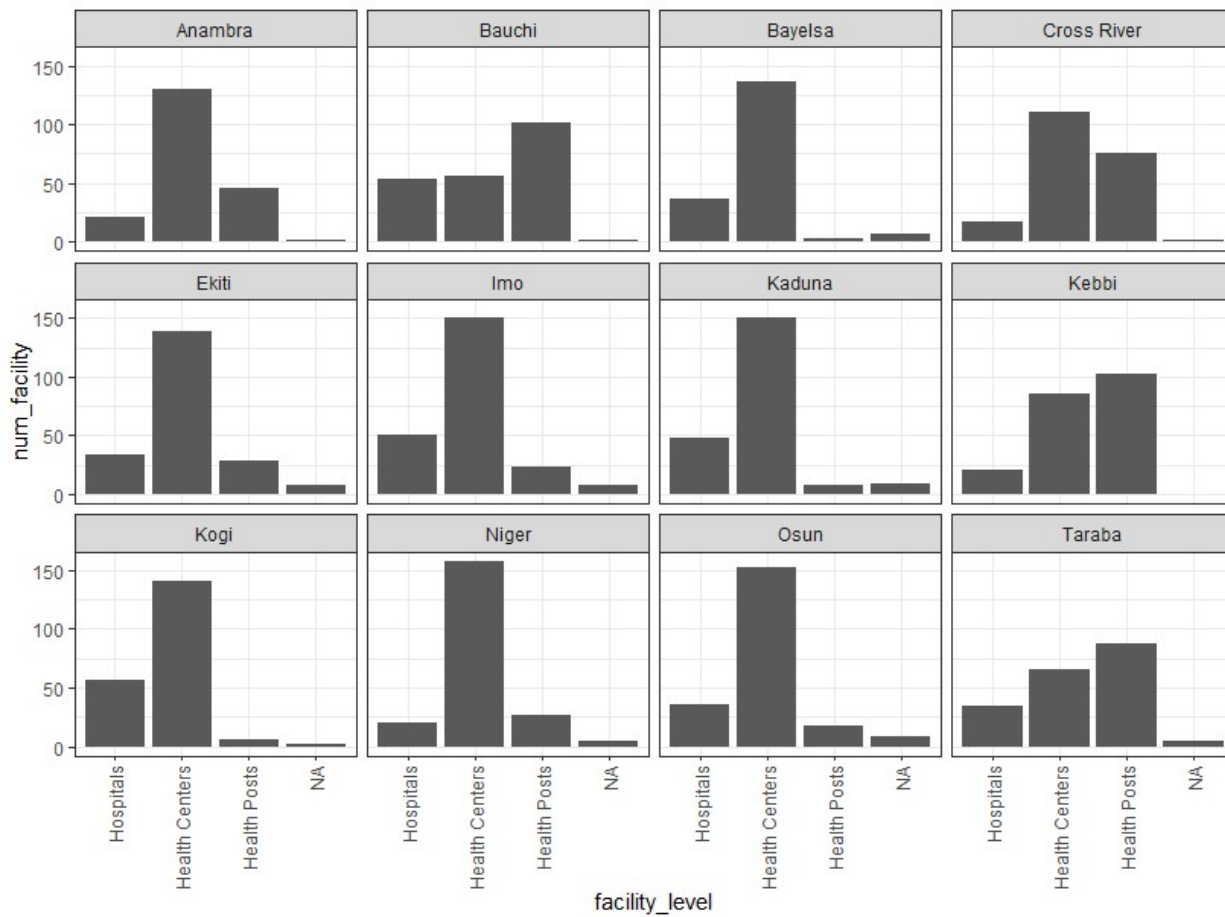

**Figure S1.** Distribution of facilities by type and state. The height of the bar represents the number of facilities falling into a given category, by state. A limited number of facilities did not have a reported facility type in the dataset and are listed under NA.

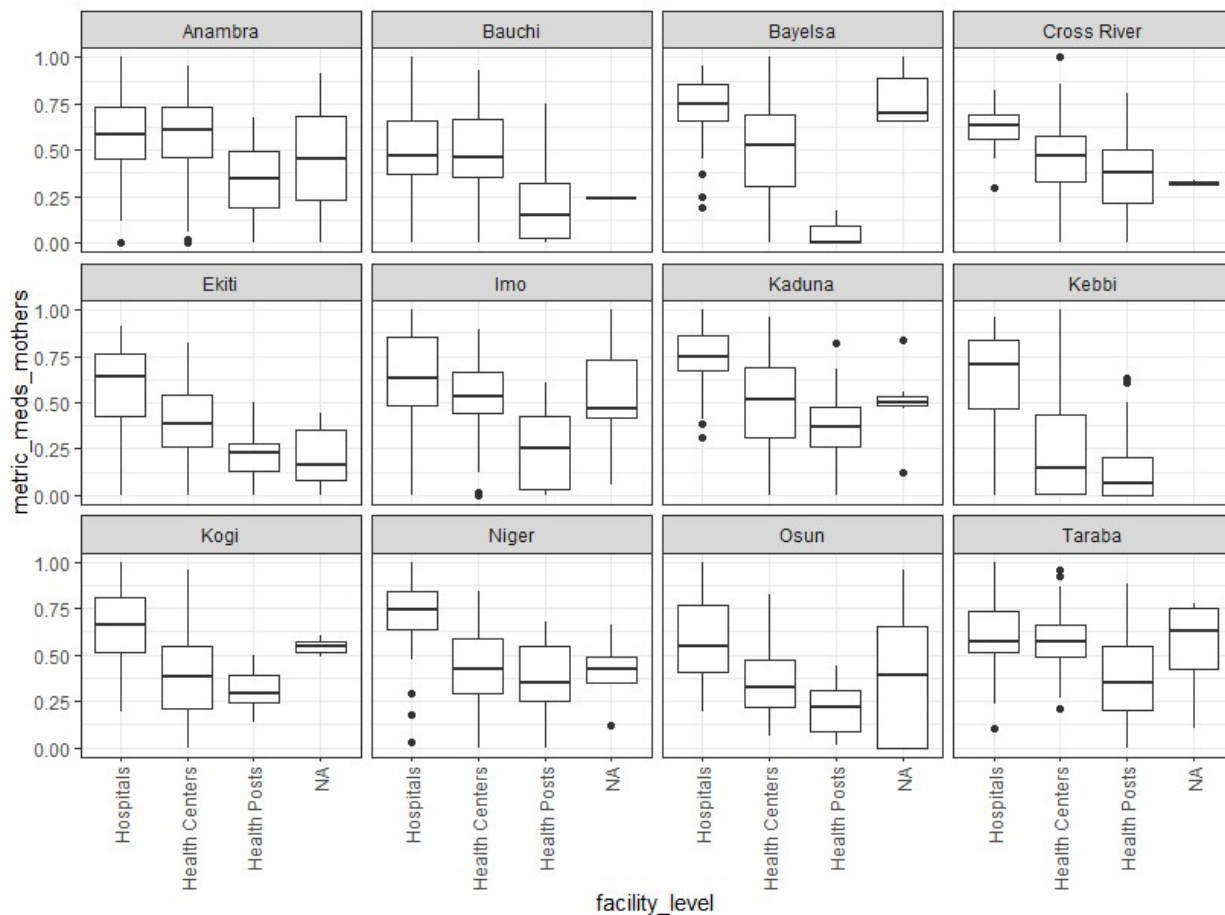

**Figure S2.** Average medication availability scores for essential medicines relevant for maternal care, by facility type and state. The y-axis represents the percentage of the essential medicines that were available in a facility on the day of the survey. Boxplots are read as: horizontal line is the median, rectangle top and bottom are the 25<sup>th</sup> and 75<sup>th</sup> percentiles, vertical lines extend to the 95<sup>th</sup> and 5<sup>th</sup> percentiles, dots represent outlier values. Facilities that did not have a facility type listed in the survey are summarized in the NA category.
